# Supplementary material for: Biodistribution and toxicological evaluation of micron- and nano-sized erythrocyte-derived optical particles in healthy Swiss Webster mice
Source: Royal Society of Chemistry journal article supplement (doi:10.1039/c8bm01448e), 2019-01-01
Supplement: c8bm01448e1.pdf [file c8bm01448e1.pdf]

## Appendix A. Electronic Supplementary Information

### **Biodistribution and toxicological evaluation of micron- and nano-sized erythrocyte-derived optical particles in healthy Swiss Webster mice**

Raviraj Vankayala<sup>at</sup>, Jenny T. Mac<sup>bt</sup>, Joshua M. Burns<sup>a</sup>, Eugene Dunn<sup>c</sup>, Stefanie Carroll<sup>c</sup>, Edver M. Bahena<sup>a</sup>, Dipti K. Patel<sup>a</sup>, Stephen Griffey<sup>c</sup>, Bahman Anvari<sup>a,b\*</sup>

*(† equally contributed)*

<sup>a</sup>*Department of Bioengineering, University of California, Riverside, 900 University Avenue, Riverside CA 92521, USA*

<sup>b</sup>*Department of Biochemistry, University of California, Riverside, 900 University Avenue, Riverside CA 92521, USA*

<sup>c</sup>*Comparative Pathology Laboratory, School of Veterinary Medicine, University of California, Davis, Sacramento, CA 95616, USA*

*\*Email Address: [anvarib@ucr.edu](mailto:anvarib@ucr.edu)*

#### *Assessment of ICG leakage from $\mu$ NETs and nNETs under physiological temperature*

Absorption spectra of  $\mu$ NETs and nNETs and their supernatants after centrifugation at physiological temperature in dark over a period of 48 hours are shown in Figs. S1(A) and (B), respectively. Using equation 2 (see manuscript text), the percentage leakage of ICG from  $\mu$ NETs and nNETs were calculated as  $\approx 9.1\%$  and  $5.6\%$ , respectively, at 48 hours post fabrication (Fig. S1(C)).

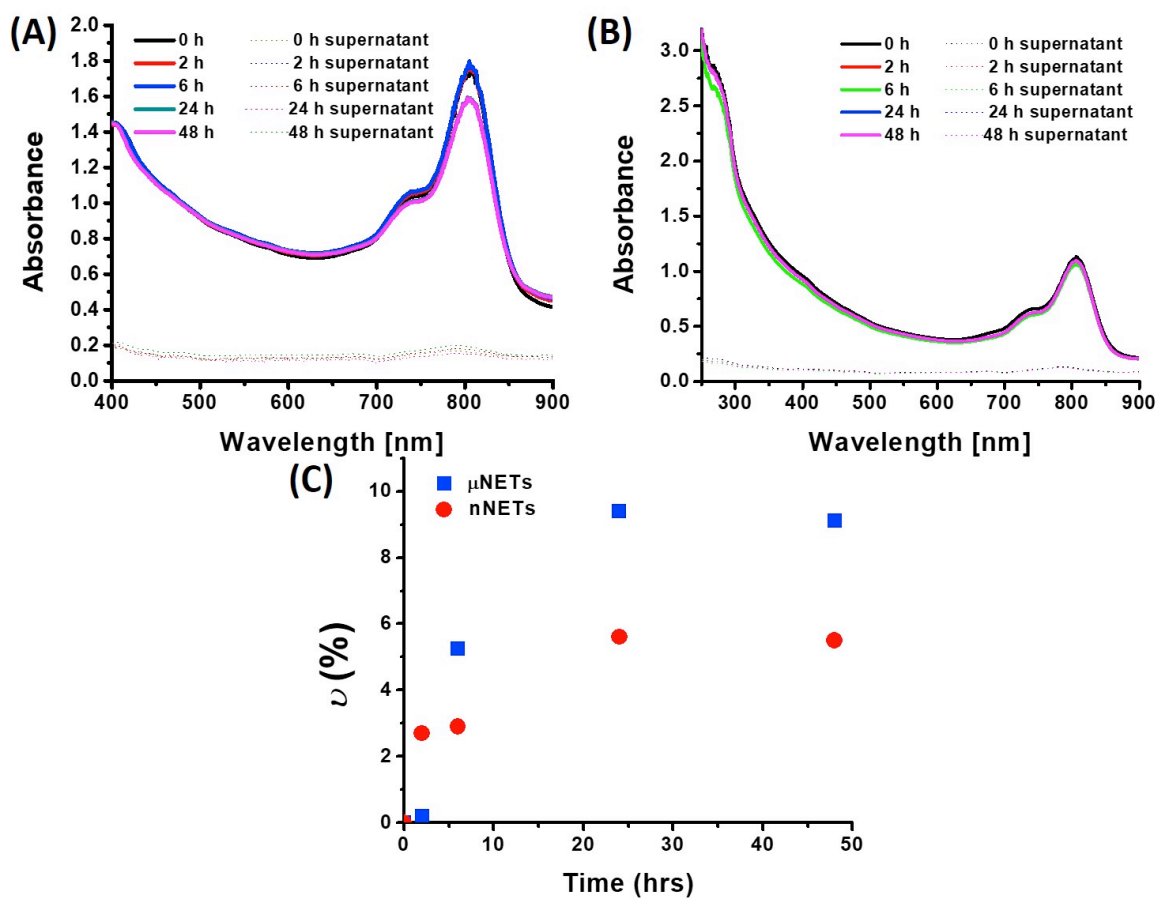

**Fig. S1.** Time-dependent absorption spectra of (A)  $\mu$ NETs, and (B) nNETs and the corresponding supernatant solutions at 37 °C. (C) % ICG leakage ( $\nu$ ) from  $\mu$ NETs and nNETs as a function of time.
